# Supplementary material for: Cell-Cell Transmission Enables HIV-1 to Evade Inhibition by Potent CD4bs Directed Antibodies
Source: PubMed Central journal article supplement (PMC3320602; doi:10.1371/journal.ppat.1002634), 2012-04-05
Supplement: ppat.1002634.s006.pdf [file ppat.1002634.s006.pdf]

**Table S2. Antibody and inhibitor concentrations**

|             | Figure 4  | Figure 4 and 6 | Figure 7  |
|-------------|-----------|----------------|-----------|
| CD4-IgG2    | 50 ug/ml  | 50 ug/ml       | 5 ug/ml   |
| CD4M47      | -         | -              | 5 ug/ml   |
| b12         | 50 ug/ml  | 50 ug/ml       | 10 ug/ml  |
| VRC01       | -         | 50 ug/ml       | -         |
| 2F5         | 100 ug/ml | 100 ug/ml      | 100 ug/ml |
| 4E10        | 100 ug/ml | 100 ug/ml      | 100 ug/ml |
| T-20        | 5 ug/ml   | 10             | 5 ug/ml   |
| DARPin 57.2 | -         | -              | 1 uM      |
| OKT4a       | -         | -              | 10 ug/ml  |
| 13B8.2      | -         | -              | 50 ug/ml  |
| PRO 140     | -         | -              | 100 ug/ml |
| AD101       | -         | -              | 10 uM     |
| PSC Rantes  | -         | -              | 1 uM      |
