# Supplementary material for: Cell-Cell Transmission Enables HIV-1 to Evade Inhibition by Potent CD4bs Directed Antibodies
Source: PLoS Pathog. 2012 Apr 5;8(4):e1002634. doi: 10.1371/journal.ppat.1002634 (PMC3320602; doi:10.1371/journal.ppat.1002634)
Supplement: Table S1 — Origin and specificity of mAbs and inhibitors. This table lists the origin and specificity of all monoclonal antibodies and inhibitors used in the current study. (PDF) [file ppat.1002634.s005.pdf]

Supplementary Table 1: Origin and specificity of mAbs and inhibitors

| Inhibitor                 | Drug class                      | Target | Epitope (HxB2) / Binding site | MW      | Reference                                                                                                                                  | Source                               |
|---------------------------|---------------------------------|--------|-------------------------------|---------|--------------------------------------------------------------------------------------------------------------------------------------------|--------------------------------------|
| <b>CD4-IgG2</b>           | tetrameric CD4 molecule         | gp120  | CD4bs                         | 175 kDa | Allaway et al.1995 <i>AIDS Res Hum Retroviruses</i> .11(5):533-9.                                                                          | W.Olson, Progenics                   |
| <b>CD4M47</b>             | miniprotein mimetic             | gp120  | CD4bs                         | 3 kDa   | Stricher et al. 2008 <i>J Mol Biol</i> , 2008. 382(2): 510-24                                                                              | J.Robinson                           |
| <b>VRC01</b>              | Antibody                        | gp120  | CD4bs                         | 150 kDa | Wu, Yang et al. 2010 <i>Science</i> .329(5993):856-61                                                                                      | J.Mascola                            |
| <b>b12</b>                | Antibody                        | gp120  | CD4bs                         | 150 kDa | Barbas et al. 1992 <i>PNAS</i> .89(19):9339-43                                                                                             | D.Burton                             |
| <b>1F7</b>                | Antibody                        | gp120  | CD4bs                         | 150 kDa | Buchacher et al.1994 <i>AIDS Res Hum Retroviruses</i> .10(4):359-69<br>Kunert et al.1998 <i>AIDS Res Hum Retroviruses</i> . 14(13):1115-28 | H.Katinger, Polymun                  |
| <b>2G12</b>               | Antibody                        | gp120  | carbohydrate                  | 150 kDa | Trkola et al.1996 <i>J Virol</i> .70(2):1100-8                                                                                             | H.Katinger, Polymun                  |
| <b>447-52D</b>            | Antibody                        | gp120  | V3 (312-315)                  | 150 kDa | Gorny et al.1992 <i>J Virol</i> .66(12):7538-42                                                                                            | S. Zolla-Pazner, NIH ARRRP           |
| <b>1-79</b>               | Antibody                        | gp121  | V3 (312-315)                  | 151 kDa | Scheid et al. 2009. <i>Nature</i> . 458:636–640.                                                                                           | M. Nussenzweig                       |
| <b>2F5</b>                | Antibody                        | gp41   | MPER (662-667)                | 150 kDa | Muster et al.1993 <i>J Virol</i> .67(11):6642-7                                                                                            | H.Katinger, Polymun                  |
| <b>4E10</b>               | Antibody                        | gp41   | MPER (671-676)                | 150 kDa | Stiegler et al. 2001 <i>AIDS Res Hum Retroviruses</i> . 10;17(18):1757-65<br>Zwick et al. 2001 <i>J Virol</i> .75(22):10892-905            | H.Katinger, Polymun                  |
| <b>T-20 (Fuzeon)</b>      | Peptide, fusion inhibitor       | gp41   | Fusion peptide                | 4.5 kDa | Wild et al.1993 <i>AIDS Res Hum Retroviruses</i> . 9(11):1051-3                                                                            | Purchased from Roche Pharmaceuticals |
| <b>DARPin 57.2</b>        | Designed Ankyrin Repeat Protein | CD4    | CD4 domain 1                  | 18 kDa  | Schweizer, Rusert et al. 2008 <i>PLoS Pathog</i> . 4(7):e1000109                                                                           | A.Trkola                             |
| <b>OKT4a</b>              | Antibody                        | CD4    | CD4 domain 1                  | 150 kDa | Nicholson et al.1986 <i>The Journal of Immunology</i> . 137(1): 323-329.                                                                   | Orthomune                            |
| <b>13B8.2</b>             | Antibody                        | CD4    | CD4 domain 1                  | 150 kDa | Benkirane et al.1993. <i>EMBO J</i> . 242(1): 233-237.                                                                                     | Q. Sattentau                         |
| <b>AD101 (SCH-350581)</b> | Small molecule inhibitor        | CCR5   | Transmembrane region of CCR5  | 0.5 kDa | Strizki, Xu et al. 2001 <i>PNAS</i> . 98(22):12718-23                                                                                      | J.Stritzki, Schering Plough          |
| <b>Maraviroc</b>          | Small molecule inhibitor        | CCR5   | Transmembrane region of CCR5  | 0.5 kDa | Dorr, Westby et al. 2005 <i>Antimicrob Agents Chemother</i> . 49(11):4721-32                                                               | Purchased from Pfizer                |
| <b>PRO 140</b>            | Antibody                        | CCR5   | Nt and ECL2 domains           | 150 kDa | Olson, Rabut et al. 1999 <i>J Virol</i> .73(5):4145-55                                                                                     | W.Olson, Progenics                   |
| <b>PSC-RANTES</b>         | Chemokine derivative            | CCR5   | ECL2                          | 8 kDa   | Hartley, Gaertner et al. 2004 <i>PNAS</i> .101(47)16460-16465                                                                              | O.Hartley                            |
